# Supplementary material
Source: Springer Nature journal article supplement (https://www.springermedizin.de/resource/supplementary/13561_2013_67_MOESM3_ESM.pdf/9687360)

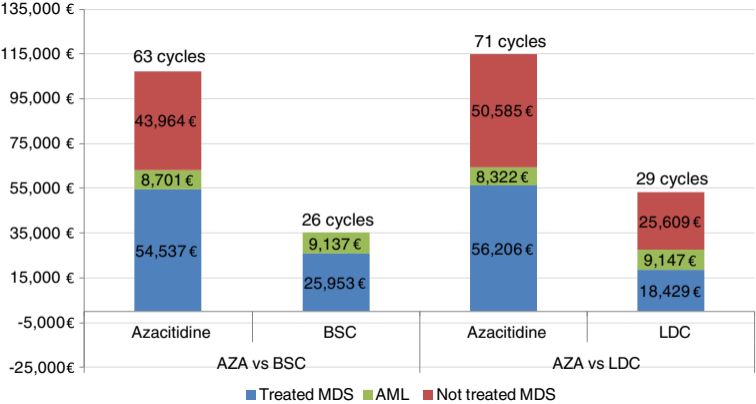

Supplement: MOESM3 [file 9687360]
